# Supplementary material for: Natural Brucella melitensis Infection and Rev. 1 Vaccination Induce Specific Brucella O-Polysaccharide Antibodies Involved in Complement Mediated Brucella Cell Killing
Source: MDPI journal article supplement (doi:10.3390/vaccines10020317), 2022-02-17
Supplement: s1 [file s1]

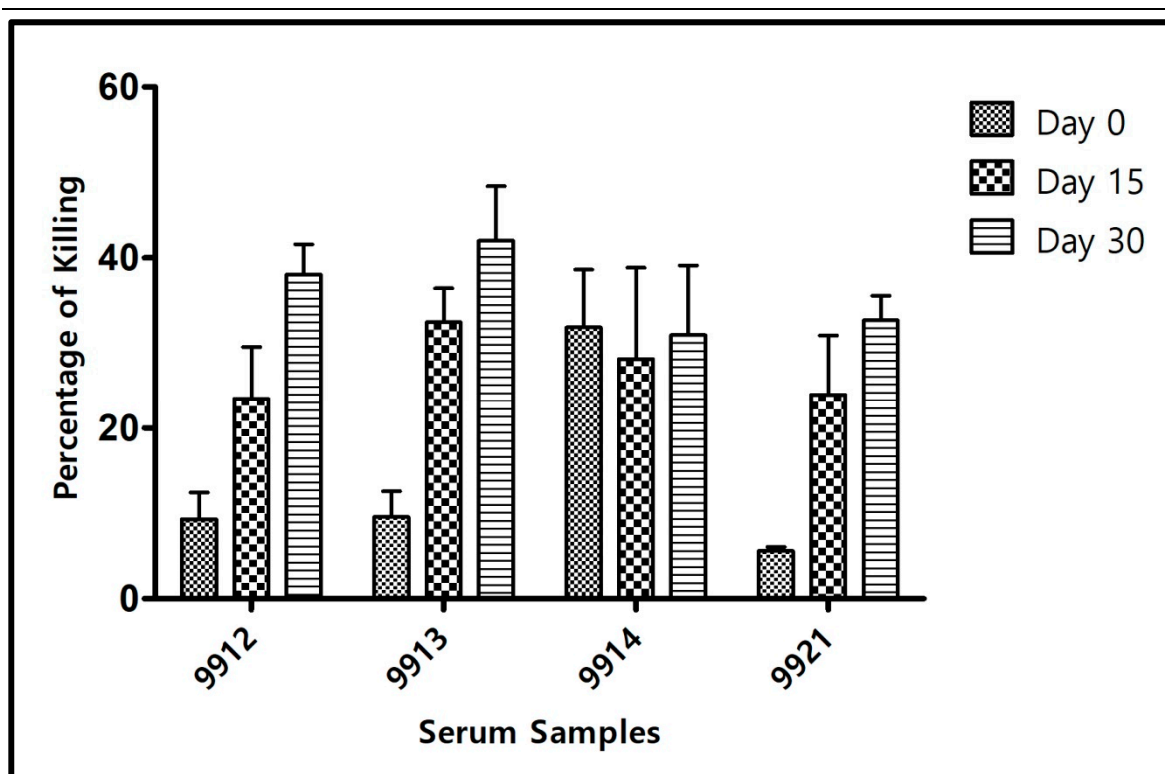

Figure S1. Percentage of *B. melitensis* strain 16M cell killing by the individual serum samples; day 0, prior to vaccination, day 15 and day 30 post-vaccination periods, respectively. (The results represent data of percentage of killing from 2 experiments, each including quadruplicates.  $\pm$  stands for standard deviation.

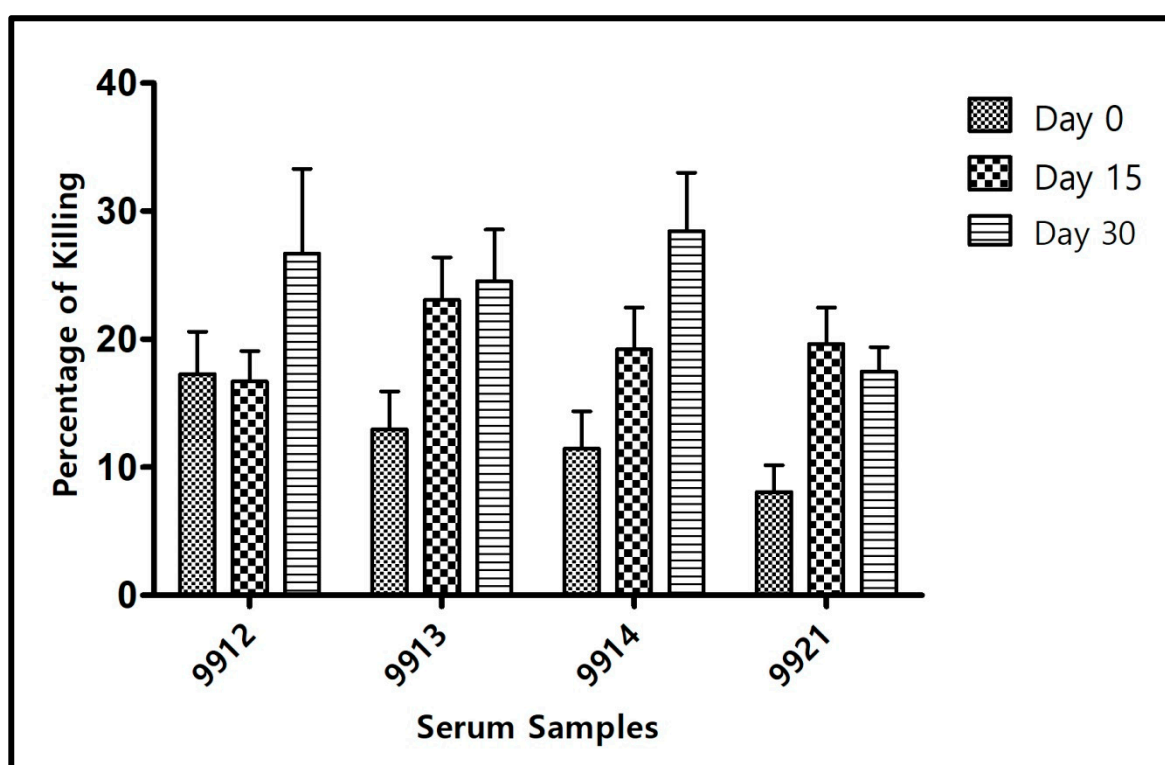

**Figure S2.** Percentages of *B. melitensis* Rev. 1 Elberg cell killing by the individual serum samples; day 0, prior to vaccination, day 15 and day 30 post-vaccination periods, respectively. The results represent data of percentage of killing from 2 experiments, each including quadruplicates.  $\pm$  stands for standard deviation.

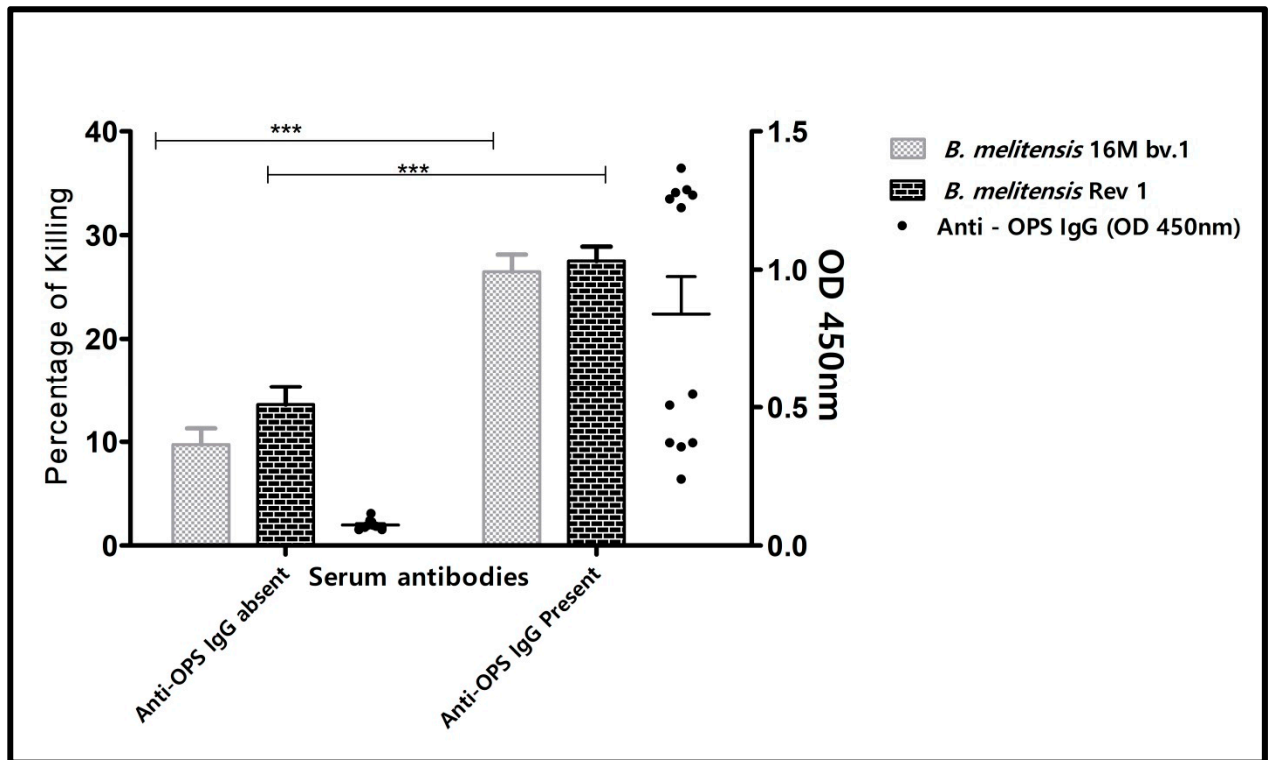

**Figure S3.** Arithmetic mean value of *Brucella* cell killing efficiency by a combined pool of the 8 serum samples prior to vaccination and at day 30 in correlation with the presence of anti – *Brucella* OPS i-ELISA antibodies. Two-Way ANOVA unweighted analysis of the mean values depicted the significance of cell killing (\*\*\*, $p>0.001$ ) against both *Brucella* species by the sera having anti – *Brucella* OPS antibodies in comparison to sera before vaccination lacking anti – *Brucella* OPS antibodies. Through unpaired two tailed t-test there is significant difference ( $p<0.001$ ) of anti – *Brucella* OPS IgG antibodies between the two groups.
